# Supplementary material
Source: PubMed Central journal article supplement (PMC2268576)
Supplement: pnas_0712278105_5.pdf [file pnas_0712278105_5.pdf]

**Table 2. Data collection and refinement of the PD-1/PD-L1 complex**

| <b>Data collection</b>                                        |                        |
|---------------------------------------------------------------|------------------------|
| X-ray source                                                  | 19-BM (Argonne)        |
| Wavelength, Å                                                 | 0.97943                |
| Resolution limits, Å                                          | 50-2.65 (2.74-2.65)    |
| Space group                                                   | P212121                |
| Unit cell dimensions, Å                                       | 56.5 x 63.9 x 159.9    |
| Completeness, %                                               | 98.9 (91.4)            |
| Average redundancy                                            | 6.0 (3.8)              |
| R <sub>sym</sub> , %                                          | 7.5 (43.4)             |
| I/σ                                                           | 19.4 (2.9)             |
| No. of observations/unique reflections                        | 103,838/17,320         |
| <b>Refinement statistics</b>                                  |                        |
| Resolution limits, Å                                          | 20-2.65 (2.72-2.65)    |
| No. of reflections in working set                             | 16,327 (1050)          |
| No. of reflections in (5%) test set                           | 898 (52)               |
| R <sub>work</sub> , %                                         | 21.4                   |
| R <sub>free</sub> , %                                         | 26.8                   |
| No. of atoms:<br>Protein; glycerol; water                     | 3,562; 6; 78           |
| Bond lengths, rmsd, Å                                         | 0.01                   |
| Bond angles, rmsd, °                                          | 1.40                   |
| Average B factor, Å <sup>2</sup>                              | 68                     |
| Ramachandran, %<br>(favored, allowed,<br>generous, forbidden) | 89.8, 9.2,<br>1.0, 0.0 |

Highest resolution shell is shown in parentheses.
