# Supplementary material
Source: PubMed Central journal article supplement (PMC2268576)
Supplement: pnas_0712278105_6.pdf [file pnas_0712278105_6.pdf]

**Table 3. Interactions between PD-1 and PD-L1 in the complex**

| Hydrogen bonds and salt bridges |                       |                    |                        |             |                          |
|---------------------------------|-----------------------|--------------------|------------------------|-------------|--------------------------|
| PD-1 contact atom               | PD-1 residue location | PD-L1 contact atom | PD-L1 residue location | Distance, Å | *** < 3.3 Å<br>* > 3.3 Å |
| N 66 Nδ2                        | C strand              | A 121 O            | G strand               | 3.5         | *                        |
| N 68 Nδ2                        | C strand              | Y 123 OH           | G strand               | 2.8         | ***                      |
| S 73 Oγ                         | CC' loop              | D 26 Oδ2           | A strand               | 3.1         | ***                      |
| N 74 Oδ1                        | CC' loop              | R 125 NH1          | G strand               | 3.2         | ***                      |
| Q 75 Oε1                        | CC' loop              | R 125 N            | G strand               | 2.8         | ***                      |
| Q 75 Nε2                        | CC' loop              | R 125 O            | G strand               | 2.7         | ***                      |
| Q 75 Nε2                        | CC' loop              | D 26 Oδ1           | A strand               | 3.0         | ***                      |
| T 76 Oγ1                        | C' strand             | Y 123 O            | G strand               | 3.0         | ***                      |
| T 76 O                          | C' strand             | K 124 Nζ           | G strand               | 3.0         | ***                      |
| K 78 Nζ                         | C' strand             | A 121 O            | G strand               | 3.2         | ***                      |
| K 78 Nζ                         | C' strand             | F 19 O             | N-terminus             | 2.9         | ***                      |
| P 130 O                         | FG loop               | Q 66 Nε2           | C' strand              | 3.5         | *                        |
| A 132 N                         | FG loop               | Q 66 Oε1           | C' strand              | 3.2         | ***                      |
| E 136 Oε1                       | G strand              | Y 123 OH           | G strand               | 2.6         | ***                      |
| E 136 Oε1                       | G strand              | R 125 NH2          | G strand               | 3.0         | ***                      |
| E 136 Oε2                       | G strand              | R 113 Ne           | F strand               | 3.3         | *                        |
| E 136 Oε2                       | G strand              | R 113 NH2          | F strand               | 3.2         | ***                      |
| E 136 Oε2                       | G strand              | R 125 NH2          | G strand               | 3.0         | ***                      |
| Water-mediated hydrogen bonds   |                       |                    |                        |             |                          |
| I 134 O                         | G strand              | Y 56 OH            | C strand               | 3.0 / 3.0   | *** / ***                |
| I 134 N                         | G strand              | Y 56 OH            | C strand               | 3.0         | ***                      |
