# Supplementary material
Source: PubMed Central journal article supplement (PMC2268576)
Supplement: pnas_0712278105_7.pdf [file pnas_0712278105_7.pdf]

**Table 4. Murine PD-1 mutations and binding data from Zhang *et al.* (1) reconciled with the PD-1/PD-L1 complex structure**

| mPD-1 residue (numbering from this work) | Residue number in ref. 1 | Human equivalent | Mutation from ref. 1 | Location from crystal structures [ref. 1 and this work] | Is any atom within 4 Å of PD-L1? | Binding BIAcore, % | Side chain located in interface or solvent | mPD-1 residue (numbering from this work) |
|------------------------------------------|--------------------------|------------------|----------------------|---------------------------------------------------------|----------------------------------|--------------------|--------------------------------------------|------------------------------------------|
| D 62                                     | 29                       | S                | A                    | BC loop                                                 | no                               | 115                | solvent                                    | D 62                                     |
| D 62                                     | 29                       | S                | S                    | BC loop                                                 | no                               | 125                | solvent                                    | D 62                                     |
| M 64*                                    | 31                       | V                | A                    | C strand                                                | yes                              | 67                 | interface                                  | M 64*                                    |
| N 66*                                    | 33                       | same             | A                    | C strand                                                | yes                              | 52                 | interface                                  | N 66*                                    |
| N 68*                                    | 35                       | Y                | none                 | C strand                                                | yes                              | not done           | interface                                  | N 68*                                    |
| S 73*                                    | 40                       | same             | none                 | CC' loop                                                | yes                              | not done           | interface                                  | S 73*                                    |
| N 74*                                    | 41                       | same             | none                 | CC' loop                                                | yes                              | not done           | interface                                  | N 74*                                    |
| Q 75*                                    | 42                       | same             | none                 | CC' loop                                                | yes                              | not done           | interface                                  | Q 75*                                    |
| T 76*                                    | 43                       | same             | none                 | C' strand                                               | yes                              | not done           | interface                                  | T 76*                                    |
| K 78*                                    | 45                       | same             | A                    | C' strand                                               | yes                              | 2                  | interface                                  | K 78*                                    |
| N 84                                     | 51                       | E                | A                    | C'C" loop                                               | no                               | 101                | solvent                                    | N 84                                     |
| L 86                                     | 53                       | R                | A                    | C" strand                                               | no                               | 102                | solvent                                    | L 86                                     |
| Q 88                                     | 55                       | same             | S                    | C" strand                                               | no                               | 88                 | solvent                                    | Q 88                                     |
| V 90*                                    | 57                       | G                | A                    | C"D loop                                                | yes                              | 87                 | interface                                  | V 90*                                    |
| H 107                                    | 74                       | same             | S                    | E strand                                                | no                               | 96                 | solvent                                    | H 107                                    |
| R 114                                    | 81                       | same             | S                    | EF loop                                                 | no                               | 89                 | solvent                                    | R 114                                    |
| L 122*                                   | 89                       | same             | none                 | F strand                                                | yes                              | not done           | interface                                  | L 122*                                   |
| G 124*                                   | 91                       | same             | none                 | F strand                                                | yes                              | not done           | interface                                  | G 124*                                   |
| I 126*                                   | 93                       | same             | A                    | F strand                                                | yes                              | 0                  | interface                                  | I 126*                                   |
| L 128*                                   | 95                       | same             | A                    | F strand/FG loop                                        | yes                              | 3                  | interface                                  | L 128*                                   |
| H 129                                    | 96                       | A                | A                    | FG loop                                                 | no                               | 60                 | solvent                                    | H 129                                    |
| P 130*                                   | 97                       | same             | A                    | FG loop                                                 | yes                              | 83                 | interface                                  | P 130*                                   |
| K 131*                                   | 98                       | same             | A                    | FG loop                                                 | yes                              | 42                 | interface                                  | K 131*                                   |
| A 132*                                   | 99                       | same             | L                    | FG loop                                                 | yes                              | 121                | interface                                  | A 132*                                   |
| I 134*                                   | 101                      | same             | A                    | G strand                                                | yes                              | 4                  | interface                                  | I 134*                                   |
| E 136*                                   | 103                      | same             | A                    | G strand                                                | yes                              | 9                  | interface                                  | E 136*                                   |
| D 62/<br>A 132                           | 99/<br>29                | same/<br>S       | L/<br>A              | FG loop/<br>BC loop                                     | yes/<br>no                       | 135                | solvent/<br>interface                      | D 62/<br>A 132                           |

\*Denotes a residue in the interface of the PD-1/PD-L1 complex.

Binding by wildtype mPD-1 was 100% in Zhang *et al.* (1).

1. Zhang X, *et al.* (2004) Structural and functional analysis of the costimulatory receptor programmed death-1. *Immunity* 20:337–347.
