# Supplementary material
Source: PubMed Central journal article supplement (PMC2268576)
Supplement: pnas_0712278105_8.pdf [file pnas_0712278105_8.pdf]

**Table 5. Murine PD-L1 mutations and binding data from Wang *et al.* (1) reconciled with murine PD-1/ human PD-L1 complex and human PD-L1 structures**

| hPD-L1 interface residues (*) and mutated residues | Murine equivalent | Mutation in ref. 1 | Residue location from modeling in ref. 1 | Location from crystal structure (this work) | Is any atom within 4 Å of PD-1? | Binding to mPD-1 by FACS | Binding to mPD-1 by ELISA, % | Side chain located in interface, solvent, or buried. | hPD-L1 interface residues (*) and mutated residues |
|----------------------------------------------------|-------------------|--------------------|------------------------------------------|---------------------------------------------|---------------------------------|--------------------------|------------------------------|------------------------------------------------------|----------------------------------------------------|
| F 19*                                              | same              | none               | n.r.                                     | N-term                                      | yes                             | not done                 | not done                     | interface                                            | F 19*                                              |
| T 20*                                              | same              | none               | n.r.                                     | N-term                                      | yes                             | not done                 | not done                     | interface                                            | T 20*                                              |
| D 26*                                              | same              | none               | n.r.                                     | A strand                                    | yes                             | not done                 | not done                     | interface                                            | D 26*                                              |
| L 27                                               | same              | A                  | A' strand                                | A' strand                                   | no                              | ++++                     | 100                          | solvent                                              | L 27                                               |
| E 31                                               | same              | S                  | A' strand                                | A' strand                                   | no                              | ++                       | 50                           | solvent                                              | E 31                                               |
| S 34                                               | same              | Y                  | B strand                                 | B strand                                    | no                              | ++++                     | 60                           | solvent                                              | S 34                                               |
| T 37                                               | same              | Y                  | B strand                                 | B strand                                    | no                              | ++                       | 5                            | solvent                                              | T 37                                               |
| D 49                                               | same              | S                  | B/C loop                                 | B/C loop                                    | no                              | ++++                     | 30                           | solvent                                              | D 49                                               |
| I 54*                                              | same              | none               | n.r.                                     | C strand                                    | yes                             | not done                 | not done                     | interface                                            | I 54*                                              |
| Y 56*                                              | same              | S                  | C strand                                 | C strand                                    | yes                             | ++++                     | 100                          | interface                                            | Y 56*                                              |
| E 58                                               | same              | S                  | C strand                                 | C strand                                    | no                              | +++++                    | 300                          | solvent                                              | E 58                                               |
| K 62                                               | E                 | S                  | C/C' loop                                | C/C' loop                                   | no                              | ++++                     | 50                           | solvent                                              | K 62                                               |
| Q 66*                                              | same              | none               | n.r.                                     | C' strand                                   | yes                             | not done                 | not done                     | interface                                            | Q 66*                                              |
| F 67                                               | same              | A                  | C' strand                                | C' strand                                   | no                              | +/-                      | 2                            | buried                                               | F 67                                               |
| H 69                                               | A                 | F                  | C' strand                                | C'/C" loop                                  | no                              | +++++                    | 300                          | solvent                                              | H 69                                               |
| E 72                                               | same              | S                  | C' strand                                | C" "strand"                                 | no                              | ++++                     | 60                           | solvent                                              | E 72                                               |
| K 75                                               | same              | S                  | C' /D loop                               | C" "strand"                                 | no                              | ++++                     | 100                          | solvent                                              | K 75                                               |
| K 89                                               | same              | S                  | D strand                                 | D strand                                    | no                              | ++++                     | 60                           | solvent                                              | K 89                                               |
| A 98                                               | same              | F                  | E strand                                 | E strand                                    | no                              | ++++                     | 40                           | solvent                                              | A 98                                               |
| Q 100                                              | same              | S                  | E strand                                 | E strand                                    | no                              | ++++                     | 100                          | solvent                                              | Q 100                                              |
| R 113*                                             | C                 | Y                  | F strand                                 | F strand                                    | yes                             | +++++                    | 300                          | interface                                            | R 113*                                             |
| M 115*                                             | I                 | A                  | F strand                                 | F strand                                    | yes                             | +/-                      | 3                            | interface                                            | M 115*                                             |
| S 117*                                             | same              | Y                  | F strand                                 | F strand                                    | yes                             | ++++                     | 100                          | interface                                            | S 117*                                             |
| A 121*                                             | same              | none               | n.r.                                     | G strand                                    | yes                             | not done                 | not done                     | interface                                            | A 121*                                             |
| D 122*                                             | same              | none               | n.r.                                     | G strand                                    | yes                             | not done                 | not done                     | interface                                            | D 122*                                             |
| Y 123*                                             | same              | none               | n.r.                                     | G strand                                    | yes                             | not done                 | not done                     | interface                                            | Y 123*                                             |
| K 124*                                             | same              | S                  | G strand                                 | G strand                                    | yes                             | +                        | 3                            | interface                                            | K 124*                                             |
| R 125*                                             | same              | none               | n.r.                                     | G strand                                    | yes                             | not done                 | not done                     | interface                                            | R 125*                                             |
| I 126                                              | same              | A                  | G strand                                 | G strand                                    | no                              | -                        | 1.4                          | buried                                               | I 126                                              |
| K 129                                              | same              | S                  | G strand                                 | G strand                                    | no                              | ++                       | 35                           | solvent                                              | K 129                                              |

\*Denotes a residue in the interface of the PD-1/PD-L1 complex.

n.r., not reported.

Binding by wildtype mPD-L1 was ++++ by FACS and 100 % by ELISA in Wang *et al.* (1).

1. Wang S, *et al.* (2003) Molecular modeling and functional mapping of B7-H1 and B7-DC uncouple costimulatory function from PD-1 interaction. *J Exp Med* 197:1083–1091.
