# Supplementary material
Source: PubMed Central journal article supplement (PMC2268576)

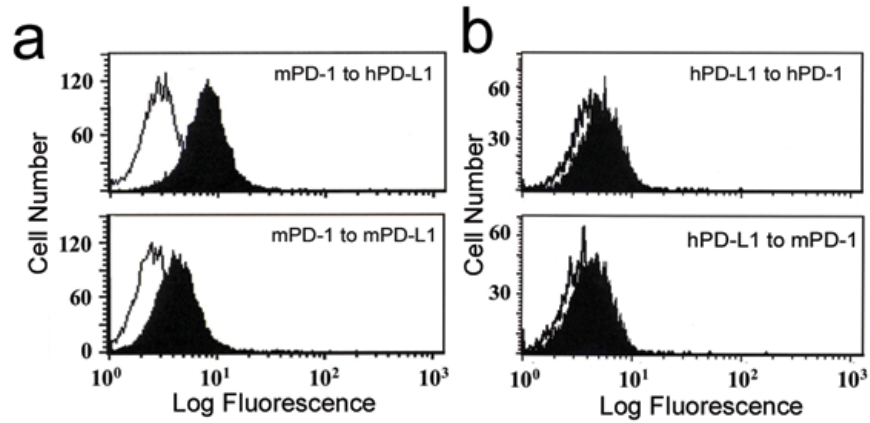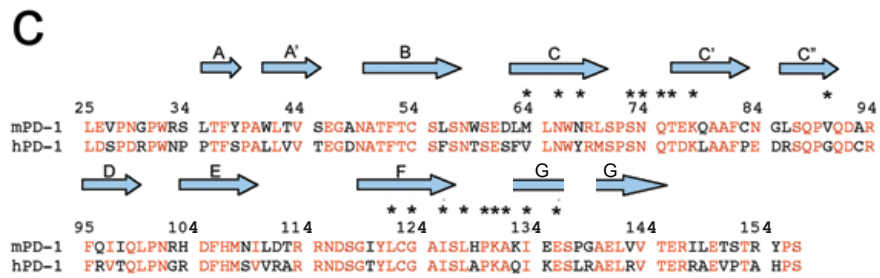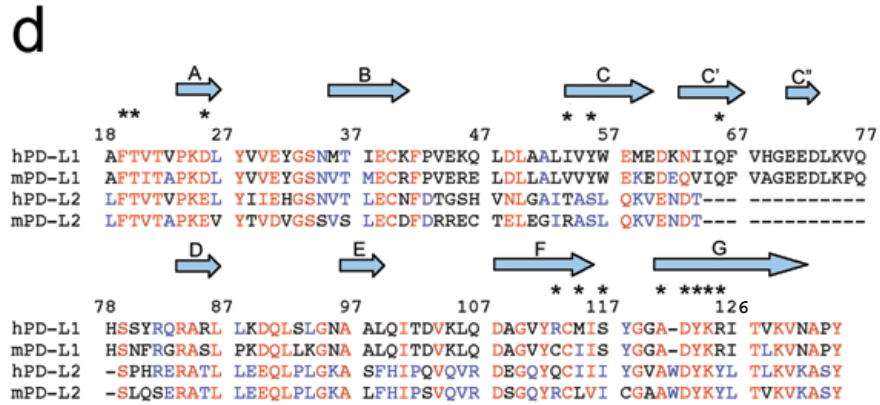

Supplement: pnas_0712278105_1.pdf [file pnas_0712278105_1.pdf]

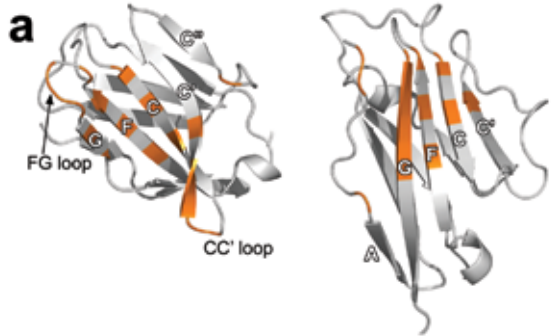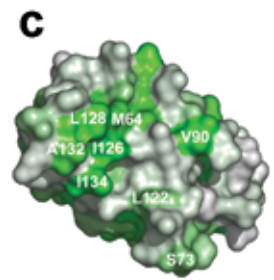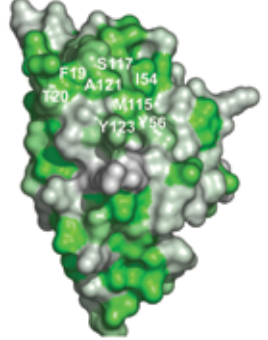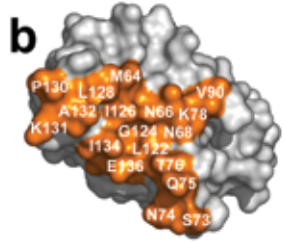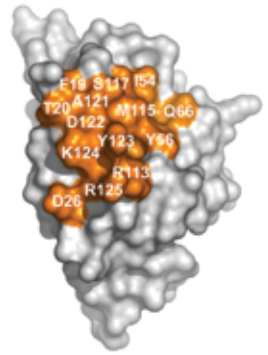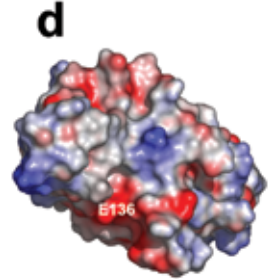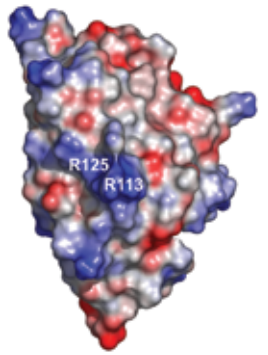

Supplement: pnas_0712278105_2.pdf [file pnas_0712278105_2.pdf]

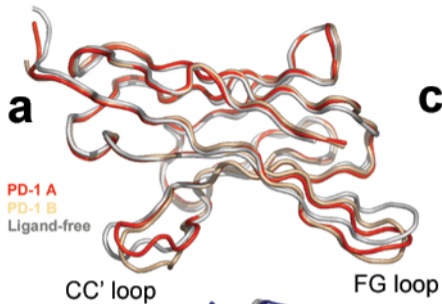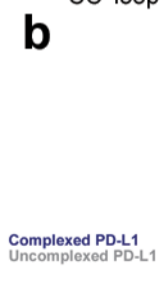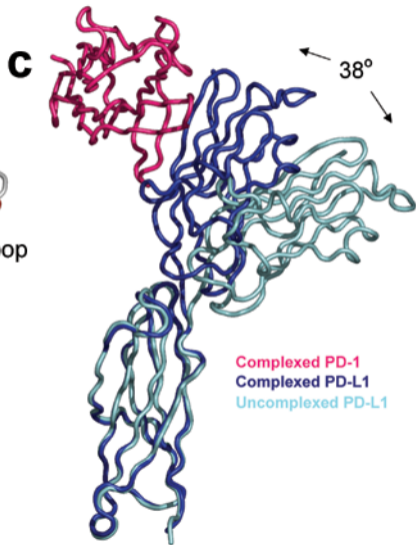

Supplement: pnas_0712278105_3.pdf [file pnas_0712278105_3.pdf]

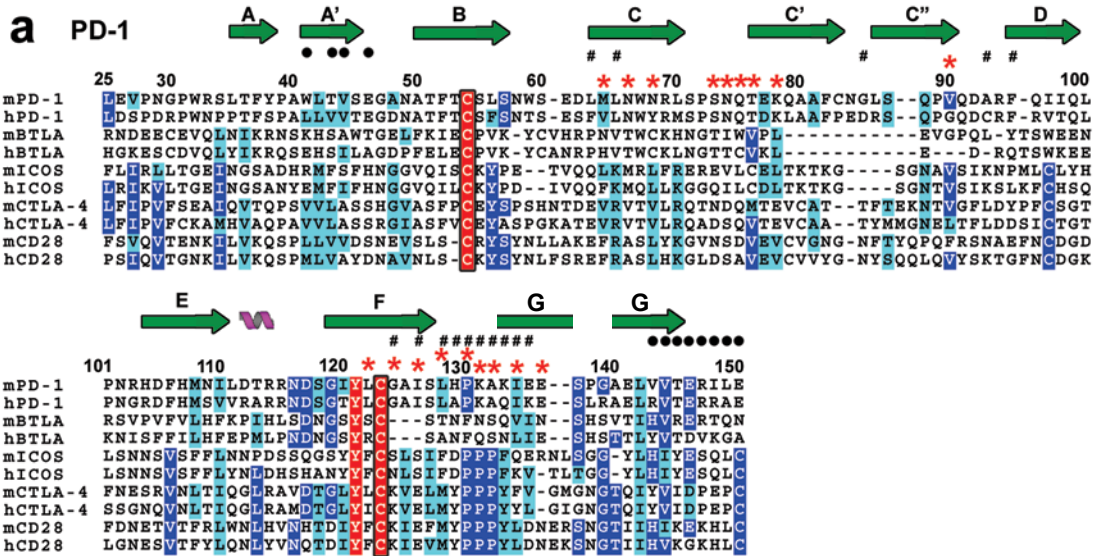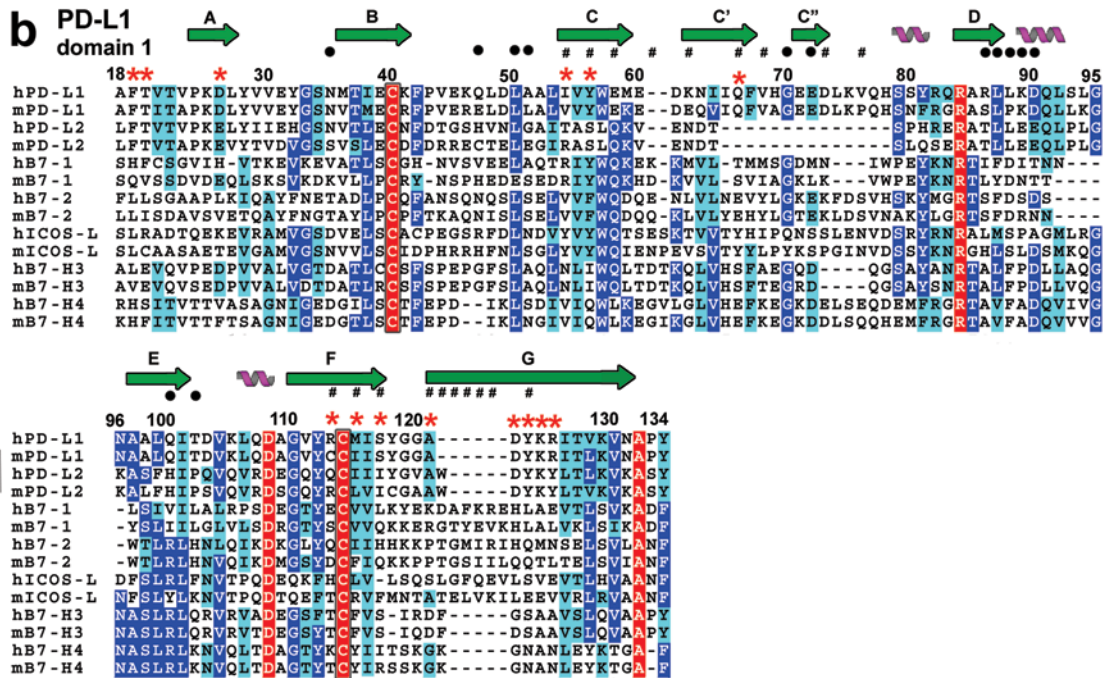

Supplement: pnas_0712278105_4.pdf [file pnas_0712278105_4.pdf]
